***Title***

- **A Multi-layer Perceptron Neural Network for Predicting the Diagnosis of Osteoporosis in Women Using Physical Activity Factors**

***Name of Author (Academic degree)***

- Emmett Kim, PhD, PT (ORCID: 0000-0002-2385-6843)

***Affiliation***

- DataAid Research Team

***Corresponding Author***

- Emmett Kim, PhD, PT

***E-mail***

- [emetk2310@gmail.com](mailto:emetk2310@gmail.com)

***Telephone***

- +82-2-670-3379

## ABSTRACT

**Background:** Osteoporosis (OP) is a bone disease caused by a decrease in bone mineral density (BMD). OP is common in women because BMD gradually decreases after age 35. OP due to decreased BMD is highly likely to cause fatal traumatic injuries such as hip fracture.

**Purpose:** To develop and evaluate a multi-layer perceptron neural network model that predicts OP using physical characteristics and activity factors of adult women over the age of 35 whose BMD begins to decline.

**Method:** Data from KNHANES were used to develop a multi-layer perceptron model for predicting OP. Data preprocessing included variable selection and sample balancing, and LASSO was used for feature selection. The model used 5 hidden layers, dropout and batch normalization and was evaluated using evaluation scores such as accuracy and recall score calculated from a confusion matrix.

**Result:** Models were trained and evaluated to predict OP using selected features including age, quality of life index, weight, grip strength and average working hours per week. The model achieved 76.8% accuracy, 74.5% precision, 80.5% recall, 77.4% F1 score, and 74.8% ROC AUC.

**Conclusion:** A multi-layer perceptron neural network for predicting OP diagnosis using physical characteristics and activity factors in women aged 35 years or older showed relatively good performance. Since the selected variables can be easily measured through surveys, assessment tool, and digital hand dynamometer, this model will be useful for screening elderly women with OP or not in areas with poor medical facilities or difficult access.

**Keywords:** Osteoporosis, predictive model, multi-layer perceptron, deep learning, physical activity

# 1 I. INTRODUCTION

2 Osteoporosis (OP) is a bone disease that occurs when bone mineral density (BMD) and  
 3 bone mass decrease.<sup>1</sup> In other words, a decrease in BMD below a certain level is regarded as  
 4 the onset of OP.<sup>1</sup> In women, rapid BMD and skeletal growth occur from menarche, when the  
 5 secretion of sex steroids, including estrogen, increases.<sup>2</sup> BMD in adult women peaks between  
 6 the ages of 25 and 35, after which women experience a gradual decline throughout their  
 7 lives.<sup>2</sup> A decrease in BMD is prominent from menopause, when female hormones decrease,  
 8 resulting in a higher rate of OP than in men.<sup>3,4</sup> In particular, estrogen is thought to be  
 9 important for maintaining BMD, and it has been reported that bone loss may occur as  
 10 estrogen levels drop during menopause, resulting in a much higher rate of OP.<sup>5,6</sup>

11 Patients diagnosed with OP have a high risk of fracture due to trauma compared to normal  
 12 people.<sup>7-9</sup> In particular, the femur, which makes up the hip joint, is a part where fractures  
 13 commonly occur due to OP, and hip fracture can cause great difficulties in independent  
 14 activities of daily life, and in severe cases, can be life threatening.<sup>10</sup> The 1-year mortality rate  
 15 due to hip fracture increases by 2% every year, and in the case of women, the 10-year  
 16 mortality rate after hip fracture is reported to be 16%.<sup>11</sup> In addition, once a fracture occurs,  
 17 the risk of a second fracture increases more than twice, and when a second fracture occurs,  
 18 the patient's mortality rate is much higher.<sup>12</sup> The mortality within 42 months after a second  
 19 hip fracture was 57.2%.<sup>13</sup> Because the mortality rate of patients with hip fractures is high, it is  
 20 important to predict or diagnose OP early to prevent hip fractures from occurring.

21 BMD is measured using dual energy X-ray absorptiometry (DXA) scans of the spine and  
 22 hip to diagnose OP.<sup>14</sup> For postmenopausal women, BMD is determined by T-score compared  
 23 to reference values of race- and sex-matched young adults.<sup>14</sup> However, one of the  
 24 disadvantages of diagnosing OP through DXA scan is that measurement errors may occur due

25 to surrounding soft tissue.<sup>15</sup> Therefore, recently, studies applying machine learning such as  
 26 deep learning to predict OP with high performance or to predict OP with a simpler X-ray  
 27 imaging technique have been actively conducted. Learning hip radiographs and clinical data  
 28 through deep learning can improve diagnostic performance for OP classification and  
 29 prediction even without using the DXA scans.<sup>16</sup> Similarly, diagnosis using deep learning  
 30 based on lumbar radiographs had the potential to screen for OP and osteopenia even without  
 31 using DXA scans.<sup>17</sup> In addition, The CT image-based deep learning diagnosis method showed  
 32 higher accuracy and could output higher specificity or sensitivity for OP evaluation.<sup>18</sup>

33 Deep learning models that predict OP using these medical diagnostic devices have been  
 34 studied, but deep learning models that predict OP according to data that can be acquired  
 35 without professional knowledge, such as physical characteristics or activity levels, have not  
 36 been studied. Bone is an organ that continuously undergoes remodeling processes of  
 37 resorption and formation, and BMD is formed by the balance of these processes.<sup>19</sup> According  
 38 to the physical stress theory, bone can remain constant in an environment given an  
 39 appropriate amount of stress.<sup>20</sup> In other words, factors that regulate stress on bones, such as  
 40 physical activity, are important in controlling BMD.<sup>20</sup> Low activity level was considered a  
 41 risk factor for OP, and vigorous physical activity such as strength training or aerobic exercise  
 42 was recommended to prevent OP.<sup>21-23</sup> However, despite the benefits of moderate loads for  
 43 BMD, too much activity due to overtraining at elite sports levels can have negative  
 44 consequences in BMD.<sup>24</sup> Moderate intensity physical activity may help prevent OP, but  
 45 excessive intensity physical activity may increase the risk of OP.<sup>25,26</sup> Therefore, data related  
 46 to physical activity will be able to be trained through deep learning as factors for predicting  
 47 OP.

48 The purpose of this study was to create a multi-layer perceptron neural network model that  
 49 predicts the diagnosis of OP in adult women with a high risk of OP using physical

50 characteristics and physical activity-related factors, and to evaluate the performance of the  
51 created multi-layer perceptron deep learning model.

52

53

## II. Materials and methods

### 1. Data Source

This study used data samples obtained from the 6th to 8th KNHANES (2015-2019), the national statistics of the Korea Disease Control and Prevention Agency. From a total of 39,759 data samples, data were extracted from women aged 35 years or older, the age at which bone density begins to decline. Data samples with missing values were excluded, and 11,929 samples were finally selected. The selected data samples were classified into 9915 data samples of normal subjects and 2014 data samples of subjects diagnosed with OP (Figure 1).

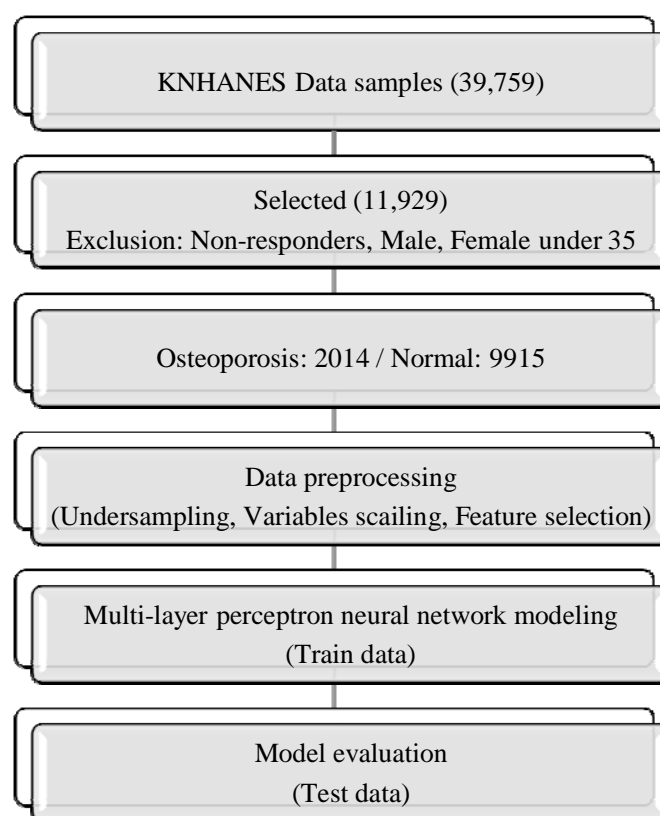

Figure 1. Flowchart of the study

## 65 2. Data Preprocessing and Feature Selection

66 The physical characteristics and activity variables of the subjects were extracted from the  
67 data for analysis. Age, weight, height, waist circumference, grip strength, body mass index,  
68 quality of life, average working hours per week, walking days per week, and strength training  
69 days per week were selected as continuous variables. Activity restriction, occupational  
70 activity, work-related moderate-intensity physical activity, work-related moderate-intensity  
71 physical activity, leisure-related high-intensity physical activity, leisure-related moderate-  
72 intensity physical activity, and weight change were selected as categorical variables (Table 1).

73 To address potential imbalances in the data between diagnosed osteoporosis (OP) and  
74 normal samples, a RandomUnderSampler function was used. This technique randomly  
75 selected an equivalent number of normal samples to match the number of OP samples.  
76 Additionally, continuous variables were scaled using the StandardScaler function, while  
77 categorical variables were transformed using one-hot encoding methods. These steps were  
78 taken to ensure that the data was prepared appropriately for subsequent analysis. To avoid  
79 overfitting due to many variables, LASSO rules were used to select appropriate variables  
80 before generating the multi-layer perceptron model.<sup>27</sup> Alpha representing the degree of  
81 regularization was set at 0.01. After the data was preprocessed, it was split into two sets: train  
82 and test data. The ratio of the train data to the test data was 7:3. This division allowed for the  
83 model to be trained on a portion of the data and then tested on a separate set to evaluate its  
84 performance.

85

Table 1. Description of Variables

| KNHANES   | Description                                          | Osteoporosis                   | Normal                           |
|-----------|------------------------------------------------------|--------------------------------|----------------------------------|
| Age       | Age                                                  | 68.69 ± 8.39                   | 54.75 ± 12.17                    |
| HE_wt     | Weight                                               | 55.88 ± 8.43                   | 58.91 ± 9.25                     |
| HE_ht     | Height                                               | 152.77 ± 5.93                  | 157.12 ± 6.15                    |
| HE_wc     | Waist circumference                                  | 82.79 ± 9.26                   | 80.73 ± 9.59                     |
| GS        | Grip strength                                        | 18.91 ± 5.03                   | 22.13 ± 5.13                     |
| BMI       | Body mass index                                      | 23.93 ± 3.29                   | 23.87 ± 3.55                     |
| EQ5D      | Quality of life                                      | 0.86 ± 0.16                    | 0.94 ± 0.11                      |
| EC_wht_23 | Average working hours per week                       | 12.36 ± 19.79                  | 21.96 ± 22.37                    |
| BE3_31    | Walking days per week                                | 4.41 ± 2.72                    | 4.75 ± 2.6                       |
| BE5_1     | Strength training days per week                      | 1.38 ± 1.17                    | 1.52 ± 1.31                      |
| LQ4_00    | Activity restriction                                 | Yes: 410<br>No: 1604           | Yes: 742<br>No: 9173             |
| EC1_1     | Occupational activity                                | Yes: 673<br>No: 1341           | Yes: 5328<br>No: 4587            |
| BE3_71    | Work-related moderate-intensity physical activity    | Yes: 12<br>No: 2002            | Yes: 53<br>No: 9862              |
| BE3_81    | Work-related moderate-intensity physical activity,   | Yes: 77<br>No: 1937            | Yes: 512<br>No: 9403             |
| BE3_75    | Leisure-related high-intensity physical activity     | Yes: 30<br>No: 1984            | Yes: 633<br>No: 9282             |
| BE3_85    | Leisure-related moderate-intensity physical activity | Yes: 222<br>No: 1792           | Yes: 2049<br>No: 7866            |
|           |                                                      | No: 1420                       | No: 6318                         |
| BO1_1     | Weight change                                        | Increase: 310<br>Decrease: 284 | Increase: 1094<br>Decrease: 2503 |

86

87



### 88 3. Multi-layer Perceptron Neural Network

89 A multi-layer perceptron is a distributed information processing structure composed of  
 90 nodes. Each layer consists of one or more nodes. The input layer receives a signal from the  
 91 outside and passes the output to the hidden layer through a weighted connection. It is then  
 92 computed in the hidden layer and passed to the output layer to perform computations and  
 93 generate predictions. The multi-layer perceptron model created in this study consists of one  
 94 input layer, one output layer, and five hidden layers. The five layers consisted of 128, 64, 32,  
 95 16, and 8 nodes, respectively. The ReLU activation function was applied to the 5 hidden  
 96 layers, and the sigmoid activation function was applied to the output layer to predict the OP.  
 97 To prevent overfitting, the dropout ratio was set to 0.25 and batch normalization was  
 98 performed. For the gradient descent algorithm to find the minimum loss function, Adam  
 99 optimizer was used. The ratio of data split and used for validation while the model was being  
 100 trained was 0.2. In order to reduce the learning time for building the model, the  
 101 EarlyStopping function was used to terminate learning when the validation loss value did not  
 102 improve for 20 epochs.

103

104

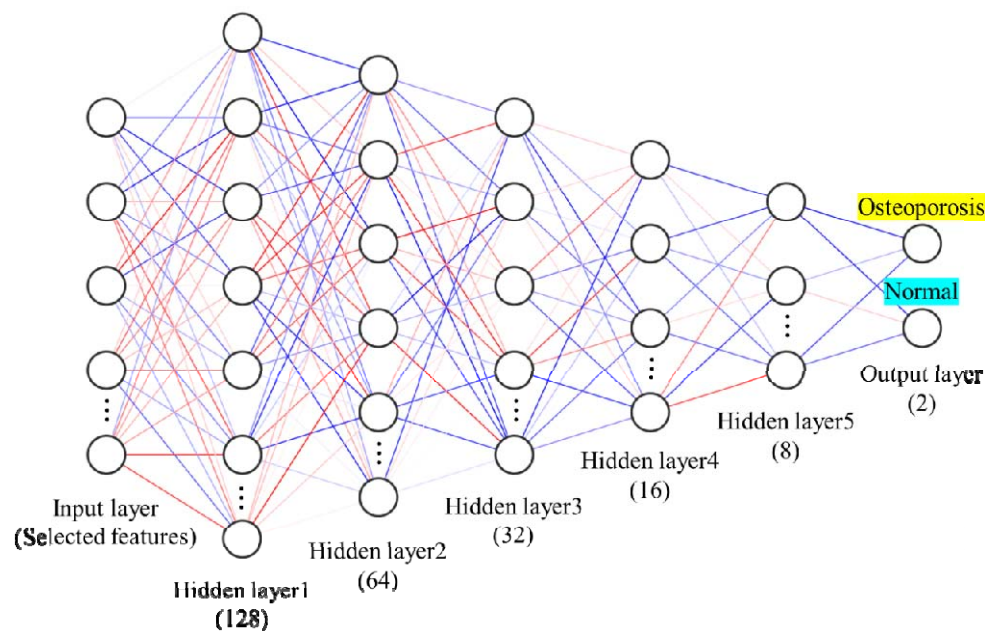

Figure 2. Schematic diagram of multi-layer perceptron neural network

105

#### 106 4. Model evaluation

107 The model's performance was assessed by generating a confusion matrix using the test data,  
 108 which classified the predicted class and the actual class as TP (true positive), FP (false  
 109 positive), FN (false negative), and TN (true negative). The accuracy, precision, recall, F1-  
 110 score, and ROC AUC were calculated from the confusion matrix to evaluate the model's  
 111 overall performance.

### III. RESULTS

#### 1. Feature Selection

The variables selected using LASSO regularization were age, quality of life index, weight, grip strength, and average working hours per week.

#### 2. Multi-layer Perceptron Neural Network Model Training

The multi-layer perceptron neural network model created using the selected features showed the following accuracy and loss (Figure 2). Training of the model was completed at the 39th epoch. The average accuracy of the top 5 models built in the process of model training was 77.34%.

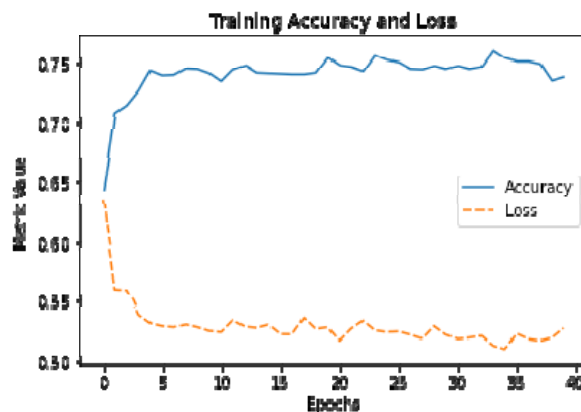

Figure 2. Training accuracy and loss curve

### 3. Model Performance

The accuracy score, which represents the number of correctly predicted data among the entire test data by the model composed of multi-layer perceptron layer neural networks, was 76.8%. The precision score for indicating actual OP among test data samples that were predicted to have OP was 74.5%. The recall score representing the prediction of having an OP diagnosis among test data samples with an actual OP diagnosis was 80.5%. The F1 score, the harmonized mean of precision and recall, was 77.4%. The ROC AUC score, which indicates how well the multi-layer perceptron neural network model can classify each class, was 74.8%.

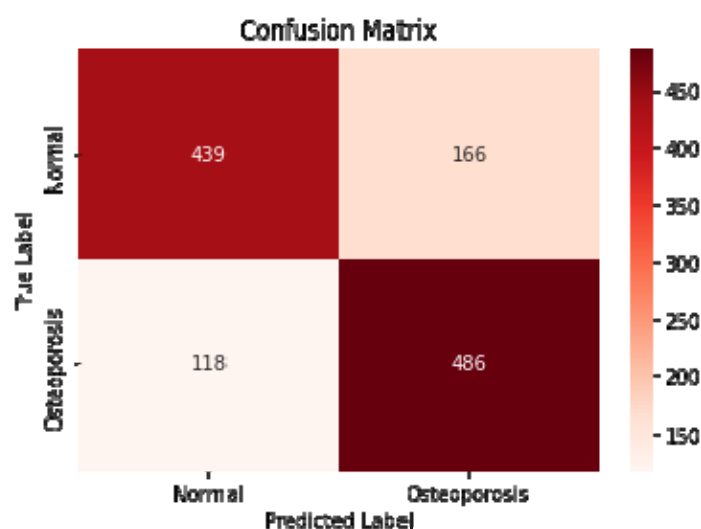

Figure 3. Confusion matrix for osteoporosis prediction

## IV. DISCUSSION

In this study, a multi-layer perceptron neural network model was created using factors related to the physical characteristics of women over the age of 35 whose bone density begins to decrease. The factors selected to create the model included not only age, weight, and grip strength, but also the quality of life and average working hours per week. All the evaluation indicators evaluating the overall performance of the model created with the above factors exceeded 74%. Among the evaluations, the recall score, which means the sensitivity of OP diagnosis, exceeded 80%.

The factors selected to model of this study may have been related to BMD, which is the criterion for diagnosis of OP. Lee et al. (2012) conducted a study on the relationship between BMD and age based on the 4th KNHANES survey data between 2008 and 2009, similar to the subjects in the data sample of this study.<sup>28</sup> In this study, women's BMD was highest in the 10-19 year age group and declined at a rate of 0.66 to 1.08% per year until age 80 years.<sup>28</sup> Additionally, moderate physical stress can stimulate bone remodeling and increase density.<sup>29</sup> Therefore, factors related to physical stress, such as muscle strength and weight, appear to be related to BMD as factors that can be controlled, unlike factors such as age.<sup>29,30</sup> Luo et al. (2020) analyzed the relationship between grip strength and BMD based on a sample of NHANES 2013–2014 survey data of Americans, adjusting for all other factors that could affect BMD, such as age, body mass index, use of female hormones, and physical activity.<sup>31</sup> Grip strength has been shown to be associated with increased femoral neck and total lumbar spine BMD in premenopausal and postmenopausal women.<sup>31</sup> Kim et al. (2012) conducted a study on the relationship between women's body weight and BMD.<sup>32</sup> In this study, they found a significant difference in weight between the abnormal group with a BMD T-score of less than -1 and the normal group with a T-score of -1 or greater.<sup>32</sup> Additionally, a weak correlation existed between body weight and T-score, with each 1 kg increase in weight

reducing the risk of abnormal BMD by 3.7%.<sup>32</sup>

The EQ-5D used to measure the quality of life variable is a tool to evaluate health-related quality of life at three levels for a total of five items: motor ability, self-management, daily life, pain and discomfort, and anxiety and depression.<sup>33</sup> In other words, the quality of life variable through the EQ-5D index can be seen as a variable that includes physical activity. The average working hours per week selected in the model of this study may be seen as a factor that quantitatively reflects the degree of physical activity.<sup>30,34</sup> However, there is no study that directly conducted the relationship between working hours and OP, and rather, the results of other studies on the relationship between OP and work can refute this view. It has been hypothesized that endocrine disorders caused by night shifts may indirectly affect the bone physiology of night shift workers.<sup>35</sup> In addition, excessive physical activity may cause menstrual disorders in women, resulting in decreasing BMD.<sup>36</sup> Nevertheless, epidemiological evidence suggests that an active lifestyle through physical activity may reduce the incidence of osteoporotic hip fractures in the elderly population, suggesting that physical activity during working hours may be an important determinant of OP diagnosis.<sup>34,37,38</sup>

Recently, models for determining OP, predicting T-score, or predicting BMD built using deep learning such as convolutional neural networks using CT and X-ray images have been proposed.<sup>39-41</sup> Yasaka et al. (2020) built a model using 1665 CT images of 183 patients, predicted BMD values with a correlation coefficient of 0.84-0.85 with actual BMD values, and showed OP prediction performance of over 96%.<sup>39</sup> Ho et al. (2021) built a model with data collected through a total of 3472 pairs of pelvic X-ray and DXA examinations and predicted BMD values only with femur bone x-ray.<sup>40</sup> The predicted BMD value showed a correlation r value of 0.85 with the actual value, and OP diagnosis through the model showed an accuracy of 88%.<sup>40</sup> In addition, Sato et al. (2022) constructed a model to predict T-score with chest x-ray, which is the most common, accessible, and inexpensive measurement.<sup>41</sup> The

correlation coefficient between the BMD value predicted by the model and the BMD value of the hip was 0.75, and the correlation coefficient of the BMD value of the lumbar spine was 0.63. ROC AUC score, a performance indicator of the model that classified normal, osteopenia, and OP by predicting T-score, was 0.89, 0.70, and 0.84, respectively.<sup>41</sup> The model constructed in our study did not predict the BMD value, and the predictive performance for OP was about 75-80%, which was relatively low compared to previous studies. Nevertheless, the advantage of this model in our study is that it can predict OP with simple physical factors without imaging techniques such as CT or X-ray. The variables for using this model were easily measurable by surveying, evaluation tool, digital hand dynamometer, and did not require very high skill.

There are several limitations to this study. First, in this study, since the model was created using only female data, it is inappropriate to use male data for OP prediction. Second, it is difficult to quantitatively describe the influence of variables for OP prediction because the hidden layer of the deep learning model makes it difficult to know the exact contribution of the variables to how they arrived at the OP prediction. Therefore, it is unclear whether OP can be prevented, or symptoms improved by controlling for the variables chosen to build this model. Future studies will need to update the model with additional data or variables to improve predictive performance or to build a model for the entire population, including males. Along with this, verification of the variables selected to build this model should be performed by adjusting the influence of other extrinsic variables.

## V. CONCLUSION

In this study, a multi-layer perceptron neural network structure was created to predict the diagnosis of OP in women aged 35 years or older by using personal characteristics and physical factors as variables. The variables used to build the model were age, weight, grip strength, quality of life index, and average working hours per week, which could be easily measured through survey, assessment tool, and digital hand dynamometer. Therefore, our model will be of great help in performing OP screening without medical equipment in areas with poor medical facilities or elderly women who have difficulty accessing hospitals.

## VI. ACKNOWLEDGEMENT

The author has no conflict of interest in relation to the publication of this study. I express my sincere gratitude to the Korea Disease Control and Prevention Agency (KDCA) for providing data from the Korea National Health and Nutrition Examination Survey (KNHANES). Data samples used for the results of this study are available upon request from the Korea Disease Control and Prevention Agency.



## VII. REFERENCE

1. Lorentzon M, Cummings SR. Osteoporosis: the evolution of a diagnosis. *J Intern Med*. 2015;277(6):650-661.
2. Clarke BL, Khosla S. Female reproductive system and bone. *Arch Biochem Biophys*. 2010;503(1):118-128.
3. Bruno AG, Broe KE, Zhang X, et al. Vertebral size, bone density, and strength in men and women matched for age and areal spine BMD. *J Bone Miner Res*. 2014;29(3):562-569.
4. Khosla S, Melton III LJ, Atkinson EJ, O'fallon WM, Klee GG, Riggs BL. Relationship of serum sex steroid levels and bone turnover markers with bone mineral density in men and women: a key role for bioavailable estrogen. *J Clin Endocrinol Metab*. 1998;83(7):2266-2274.
5. Felson DT, Zhang Y, Hannan MT, Kiel DP, Wilson P, Anderson JJ. The effect of postmenopausal estrogen therapy on bone density in elderly women. *N Engl J Med*. 1993;329(16):1141-1146.
6. Popat VB, Calis KA, Vanderhoof VH, et al. Bone mineral density in estrogen-deficient young women. *J Clin Endocrinol Metab*. 2009;94(7):2277-2283.
7. Lu Y, Genant HK, Shepherd J, et al. Classification of osteoporosis based on bone mineral densities. *J Bone Miner Res*. 2001;16(5):901-910.
8. Marshall D, Johnell O, Wedel H. Meta-analysis of how well measures of bone mineral density predict occurrence of osteoporotic fractures. *Bmj*. 1996;312(7041):1254-1259.
9. Seeman E. Reduced bone density in women with fractures: contribution of low peak bone density and rapid bone loss. *Osteoporos Int*. 1994;4:S15-S25.

- 246 10. Alarcón T, González-Montalvo JI, Gotor P, Madero R, Otero A. Activities of daily  
247 living after hip fracture: profile and rate of recovery during 2 years of follow-up.  
248 *Osteoporos Int*. 2011;22:1609-1613.
- 249 11. Guzon-Illescas O, Perez Fernandez E, Crespí Villarias N, et al. Mortality after  
250 osteoporotic hip fracture: incidence, trends, and associated factors. *J Orthop Surg Res*.  
251 2019;14(1):1-9.
- 252 12. Omsland TK, Holvik K, Meyer HE, et al. Hip fractures in Norway 1999–2008: time  
253 trends in total incidence and second hip fracture rates. A NOREPOS study. *Eur J*  
254 *Epidemiol*. 2012;27:807-814.
- 255 13. Solou K, Tyllianakis M, Kouzelis A, Lakoumentas J, Panagopoulos A. Morbidity and  
256 mortality after second hip fracture with and without nursing care program. *Cureus*.  
257 2022;14(3).
- 258 14. Blake GM, Fogelman I. The role of DXA bone density scans in the diagnosis and  
259 treatment of osteoporosis. *Postgrad Med J*. 2007;83(982):509-517.
- 260 15. Lochmüller E-M, Krefting N, Bürklein D, Eckstein F, Lochmüller EM, Bürklein D.  
261 Effect of fixation, soft-tissues, and scan projection on bone mineral measurements with  
262 dual energy X-ray absorptiometry (DXA). *Calcif Tissue Int*. 2001;68(3).
- 263 16. Yamamoto N, Sukegawa S, Kitamura A, et al. Deep learning for osteoporosis  
264 classification using hip radiographs and patient clinical covariates. *Biomolecules*.  
265 2020;10(11):1534.
- 266 17. Zhang B, Yu K, Ning Z, et al. Deep learning of lumbar spine X-ray for osteopenia and  
267 osteoporosis screening: A multicenter retrospective cohort study. *Bone*.  
268 2020;140:115561.

- 269 18. Pickhardt PJ, Nguyen T, Perez AA, et al. Improved CT-based Osteoporosis  
270 Assessment with a Fully Automated Deep Learning Tool. *Radiol Artif Intell.*  
271 2022;4(5):e220042.
- 272 19. Manolagas SC. Birth and death of bone cells: basic regulatory mechanisms and  
273 implications for the pathogenesis and treatment of osteoporosis. *Endocr Rev.*  
274 2000;21(2):115-137.
- 275 20. Mueller MJ, Maluf KS. Tissue adaptation to physical stress: a proposed “Physical  
276 Stress Theory” to guide physical therapist practice, education, and research. *Phys Ther.*  
277 2002;82(4):383-403.
- 278 21. Sinaki M, Pfeifer M, Preisinger E, et al. The role of exercise in the treatment of  
279 osteoporosis. *Curr Osteoporos Rep.* 2010;8:138-144.
- 280 22. Todd JA, Robinson RJ. Osteoporosis and exercise. *Postgrad Med J.*  
281 2003;79(932):320-323.
- 282 23. Schmitt NM, Schmitt J, Dören M. The role of physical activity in the prevention of  
283 osteoporosis in postmenopausal women—an update. *Maturitas.* 2009;63(1):34-38.
- 284 24. Herbert AJ, Williams AG, Hennis PJ, et al. The interactions of physical activity,  
285 exercise and genetics and their associations with bone mineral density: implications for  
286 injury risk in elite athletes. *Eur J Appl Physiol.* 2019;119:29-47.
- 287 25. Wolman RL. ABC of sports medicine: Osteoporosis and exercise. *BMJ.*  
288 1994;309(6951):400.
- 289 26. Voss LA, Fadale PD, Hulstyn MJ. Exercise-induced loss of bone density in athletes. *J*  
290 *Am Acad Orthop Surg Glob Res Rev.* 1998;6(6):349-357.
- 291 27. Muthukrishnan R, Rohini R. LASSO: A feature selection technique in predictive

- 292 modeling for machine learning. In: *2016 IEEE International Conference on Advances*  
293 *in Computer Applications (ICACA)*. IEEE; 2016:18-20.
- 294 28. Lee EY, Kim D, Kim KM, et al. Age-related bone mineral density patterns in Koreans  
295 (KNHANES IV). *J Clin Endocrinol Metab*. 2012;97(9):3310-3318.
- 296 29. Morel J, Combe B, Francisco J, Bernard J. Bone mineral density of 704 amateur  
297 sportsmen involved in different physical activities. *Osteoporos Int*. 2001;12:152-157.
- 298 30. Cadore EL, Brentano MA, Kruel LFM. Effects of the physical activity on the bone  
299 mineral density and bone remodeling. *Rev Bras Med do Esporte*. 2005;11:373-379.
- 300 31. Luo Y, Jiang K, He M. Association between grip strength and bone mineral density in  
301 general US population of NHANES 2013–2014. *Arch Osteoporos*. 2020;15:1-9.
- 302 32. Kim SJ, Yang W-G, Cho E, Park E-C. Relationship between weight, body mass index  
303 and bone mineral density of lumbar spine in women. *J bone Metab*. 2012;19(2):95-102.
- 304 33. Devlin NJ, Brooks R. EQ-5D and the EuroQol group: past, present and future. *Appl*  
305 *Health Econ Health Policy*. 2017;15(2):127-137.
- 306 34. D ppe H, G rdsell P, Johnell O, Nilsson BE, Ringsberg K. Bone mineral density,  
307 muscle strength and physical activity: a population-based study of 332 subjects aged  
308 15-42 years. *Acta Orthop Scand*. 1997;68(2):97-103.
- 309 35. Bukowska-Damska A, Skowronska-Jozwiak E, Peplonska B. Night shift work and  
310 osteoporosis: evidence and hypothesis. *Chronobiol Int*. 2019;36(2):171-180.
- 311 36. Rutherford OM. Is there a role for exercise in the prevention of osteoporotic fractures?  
312 *Br J Sports Med*. 1999;33(6):378-386.
- 313 37. Jordan KM, Cooper C. Epidemiology of osteoporosis. *Best Pract Res Clin Rheumatol*.

314 2002;16(5):795-806.

315 38. Nguyen T V, Sambrook PN, Eisman JA. Bone loss, physical activity, and weight  
316 change in elderly women: the Dubbo Osteoporosis Epidemiology Study. *J bone Miner*  
317 *Res.* 1998;13(9):1458-1467.

318 39. Yasaka K, Akai H, Kunimatsu A, Kiryu S, Abe O. Prediction of bone mineral density  
319 from computed tomography: application of deep learning with a convolutional neural  
320 network. *Eur Radiol.* 2020;30:3549-3557.

321 40. Ho C-S, Chen Y-P, Fan T-Y, et al. Application of deep learning neural network in  
322 predicting bone mineral density from plain X-ray radiography. *Arch Osteoporos.*  
323 2021;16:1-12.

324 41. Sato Y, Yamamoto N, Inagaki N, et al. Deep learning for bone mineral density and T-  
325 score prediction from chest X-rays: A multicenter study. *Biomedicines.*  
326 2022;10(9):2323.

327
